# Polygenic transcriptome risk scores improve portability of polygenic risk scores across ancestries

Yanyu Liang<sup>1,\*</sup> Milton Pividori<sup>2</sup> Ani Manichaikul<sup>3</sup> Abraham A. Palmer<sup>4</sup>  
Nancy J. Cox<sup>5</sup> Heather Wheeler<sup>6,7,8</sup> Hae Kyung Im<sup>1,\*</sup>

November 11, 2020

**1** Section of Genetic Medicine, Department of Medicine, The University of Chicago, Chicago, IL, USA

**2** Department of Systems Pharmacology and Translational Therapeutics, University of Pennsylvania,  
Pennsylvania, PA, USA

**3** Center for Public Health Genomics, University of Virginia, Charlottesville, VA, USA

**4** Department of Psychiatry, University of California San Diego, San Diego, CA, USA

**5** Vanderbilt Genetic Institute, Vanderbilt University Medical Center, Nashville, TN

**6** Department of Biology, Loyola University Chicago, Chicago, IL.

**7** Program in Bioinformatics, Loyola University Chicago, Chicago, IL.

**8** Department of Public Health Sciences, Stritch School of Medicine, Loyola University Chicago, Maywood,  
IL.

\* Correspondence to [yanyul@uchicago.edu](mailto:yanyul@uchicago.edu) and [haky@uchicago.edu](mailto:haky@uchicago.edu)

## Abstract

Polygenic risk scores (PRS) are on course to translate the results of genome-wide association studies (GWAS) into clinical practice. To date, most GWAS have been based on individuals of European-ancestry, meaning that the utility of PRS for non-European populations is limited because SNP effects and LD patterns may not be conserved across populations. We hypothesized that cross population prediction at the level of genes rather than SNPs would be more effective, since the effect of genes on traits is likely to be more highly conserved. Therefore, we developed a framework to convert effect sizes at SNPs into effect sizes for genetically predicted transcript abundance, which we used for prediction in non-European populations. We compared this approach, which we call polygenic transcriptome risk scores (PTRS), to PRS, using data from 17 quantitative traits that were measured in multiple ancestries (European, African, East Asian, and South Asian) by UK Biobank. On average, PTRS using whole blood predicted transcriptome had lower absolute prediction accuracy than PRS, as we expected since

29 not all regulatory processes were captured by a single tissue. However, as hypothesized, we found that  
30 in the African target set, the portability (prediction accuracy relative to the European reference set) was  
31 significantly higher for PTRS than PRS ( $p=0.03$ ) with additional gain when transcriptomic prediction  
32 models ancestry matched the target population ( $p=0.021$ ). Taken together, our results suggest that  
33 using PTRS can improve prediction in underrepresented populations and that increasing the diversity of  
34 transcriptomic data may be an effective way to improve portability of GWAS results between populations  
35 and help reduce health disparities.

## 36 Introduction

37 Polygenic risk scores (PRS) for a variety of traits are increasingly becoming accurate enough to be useful  
38 for clinical practice, realizing the longstanding goal of personalized medicine. PRS for coronary artery  
39 disease (CAD) have been shown to provide prediction that has been compared to monogenic mutations of  
40 hypercholesterolemia (Khera et al., 2018). In practice, PRS may impact a larger proportion of patients  
41 compared to monogenic mutations; for example, PRS for CAD provide potentially actionable information  
42 for 8% of the population (for whom the risk increases by three-fold) whereas known monogenic mutations  
43 are only informative for about 0.4% of patients. However, a major limitation of this approach is that PRS  
44 developed in one human ancestry group do not perform well in other ancestry groups, limiting their utility  
45 and exacerbating already severe health disparities (Curtis, 2018; Martin et al., 2019). This problem is being  
46 addressed by large efforts such as Human Heritability and Health in Africa (H3Africa) Choudhury et al. (2020),  
47 Million Veterans Project (Gaziano et al., 2016), AllofUs (of Us Research Program Investigators, 2019) and  
48 TOPMED (Taliun et al., 2019) that are recruiting individuals from diverse ancestry groups.

49 However, these efforts are time consuming, enormously expensive and will have to be repeated at scale,  
50 for numerous traits, across numerous ancestry groups. Therefore, methods that can use GWAS results from  
51 one population for prediction in other ancestry groups is highly desirable. Analysis of GWAS conducted in  
52 different populations suggested that a considerable fraction of causal SNPs are shared across populations (Shi  
53 et al., 2020). This suggests that efforts to develop methods that transfers knowledge across populations can  
54 provide a cost effective ways to improve prediction in underrepresented ancestry groups. Many loci identified  
55 by GWAS are thought to exert their effects by regulating gene expression. Motivated by this mechanistic  
56 insight, multiple eQTL studies have been performed over the last decade (The GTEx Consortium, 2020;  
57 Vösa et al., 2018). The GTEx consortium, for example, has sequenced mRNAs samples from 50 tissues  
58 across the human body from more than 900 donor individuals. PrediXcan (Gamazon et al., 2015) and other  
59 TWAS methods (Gusev et al., 2016; Hu et al., 2019) leverage these reference transcriptome datasets to train  
60 prediction models of gene expression levels and correlate the genetically predicted gene expression levels  
61 with complex traits to identify causal genes. Given the common biology of human disease across populations

62 and the mediating role of the transcriptome, we hypothesized that that prediction at the level of estimated  
63 transcript abundance rather than SNPs might be more effective across populations.

64 Therefore, we propose the polygenic transcriptomic risk score (PTRS) as a gene-based complement to  
65 the PRS that has the potential for superior portability across human ancestry groups. One advantage of  
66 PTRS is that the smaller number of features (tens of thousands of genes rather than millions of SNPs),  
67 means that optimizing the parameters to build PTRS is more manageable than PRS. Another advantage of  
68 PTRS is that training transcriptome prediction models requires much smaller samples than training PRS,  
69 and can then be used for prediction of many different traits. Furthermore, training data for non-European  
70 individuals are becoming increasingly available. Finally, because PTRS is gene-based, it is inherently more  
71 biologically interpretable than PRS.

72 In this paper, we explored the advantages of PTRS using the UK Biobank (UKB), which provides  
73 genotype and phenotype data in half a million individuals (Bycroft et al., 2018). Although the majority  
74 of participants in UKB are of European-descent, several thousand individuals of non-European descent are  
75 also available, and could be used to compare prediction by PRS and PTRS across ancestries. We started by  
76 testing whether the genetically predicted transcriptome could explain a sizeable portion of trait heritability  
77 and whether matching the transcriptome training and risk score testing populations' ancestry would be  
78 beneficial. Then, we built PRS and PTRS for a range of complex traits and compared their prediction  
79 accuracy and portability across populations.

## 80 Results

81 Before describing the results we define and clarify some terminology. In this paper, there are two types of  
82 prediction: 1) gene expression level prediction from genotype data and 2) complex trait prediction using PRS  
83 or PTRS. PRS uses genotype data directly and PTRS uses linear combinations of genotypes representing  
84 predicted gene expression levels. To simplify exposition, we will only use the term *training* for the calculation  
85 of weights for predicting gene expression levels using genotype data. The *training* of transcriptome (gene  
86 expression levels) prediction weights had been performed previously and we simply downloaded them from  
87 predictdb.org. When we estimate optimal weights for PRS and PTRS, we will use the terms *building* or  
88 *constructing*. We performed the *building* of PRS and PTRS using the *discovery* set. The testing of the risk  
89 scores, PRS and PTRS, were performed in what we call the *target* sets. For the remainder of the paper, we will  
90 refer to individuals by their ancestry and drop the -descent suffix. Unless otherwise clarified, we will use the  
91 term transcriptome to mean the set of predicted expression levels of genes. GTEx EUR transcriptome should  
92 be interpreted as the set of predicted gene expression levels using weights trained in European samples from  
93 GTEx. Similarly, MESA EUR transcriptome, will refer to the predicted transcriptome using weights trained  
94 with the MESA European samples. MESA AFHI transcriptome will refer to the predicted transcriptome

95 using weights trained with a combination of African American and Hispanic individuals from the MESA  
96 study.

## 97 **Experimental setup**

98 An overview of the experimental setup describing the discovery, training, and target sets used in the paper is  
99 shown in Fig.1. We randomly selected 356,476 unrelated Europeans in the UK Biobank for the discovery set.  
100 For testing the performance of risk scores, we constructed 5 target sets with participants of various ancestries  
101 in the UK Biobank. We used 2,835 African, 1,326 East Asian, and 4,789 South Asian individuals for the non  
102 European target sets. We also reserved two randomly selected sets of 5,000 Europeans as additional target  
103 sets. One was selected as the EUR reference set and the second European target was used as a test set to  
104 assess the the variability of the results within the same ancestry.

105 For predicting the transcriptome, we downloaded prediction weights from multiple ancestries collected in  
106 predictdb.org. The first set of models had been trained in European individuals from the GTEx v8 release  
107 (Barbeira et al., 2020a) in whole blood and 9 other tissues chosen by had been large sample size. The second  
108 set of models had been trained using monocyte samples of Europeans, African Americans, and Hispanics  
109 from the MESA cohort (Mogil et al., 2018).

110 For our tests, we focused on the 17 anthropomorphic and blood phenotypes used by Martin et al. (Martin  
111 et al., 2019).

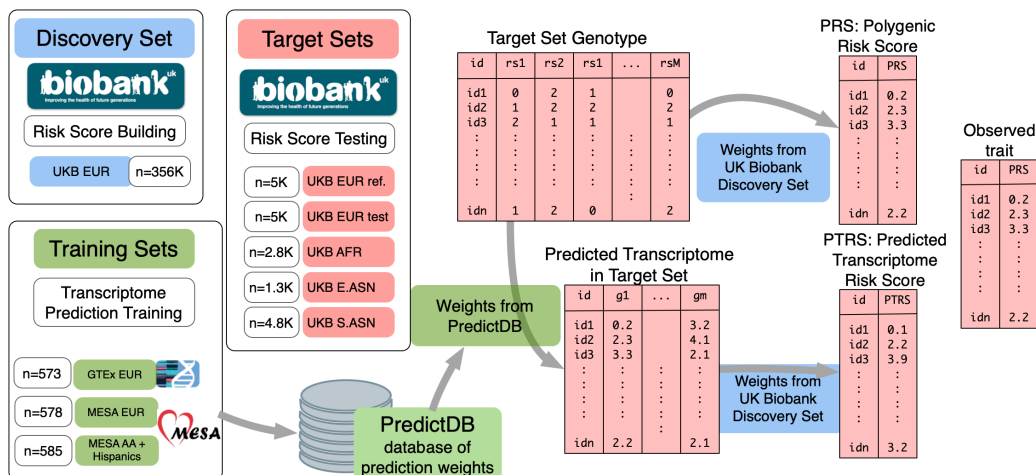

**Figure 1: Experiment setup.** This figure summarizes the experimental set up used for testing the portability of PRS and PTRS across populations. The weights for calculating PRS and PTRS were estimated in the *discovery set*, which consisted of 345K randomly sampled individuals of European-descent from the UK Biobank. The *training sets* where the weights for the prediction of transcriptomes were computed are shown in green. We downloaded the weights trained previously from predictdb.org. We sampled 5 *target sets* from the UK Biobank for testing the risk scores: two randomly sampled sets of European-, one African-, one East Asian-, and one South Asian-descent individuals. For each of the 5 *target sets*, predicted transcriptomes were calculated using the weights trained in each of the three *training sets*: GTEx EUR, MESA-EUR, MESA-AFHI.

## 112 Predicted transcriptome captures a significant portion of trait variability

113 To assess the feasibility and to quantify the potential for PTRS to predict human traits, we calculated the  
 114 proportion of variance explained by the predicted transcriptome assuming random effects of gene expression  
 115 levels. The approach is analogous to standard SNP-heritability estimation (Yang et al., 2010) where the  
 116 “predicted expression relatedness matrix” is used instead of the genetic relatedness matrix. In this section,  
 117 we calculated the predicted transcriptome using the GTEx EUR weights using the European target set  
 118 genotype data. Using these predicted expression levels, we calculated the “predicted expression relatedness  
 119 matrix” (instead of the genetic relatedness matrix) and applied the standard restricted maximum likelihood  
 120 estimation to calculate the proportion of variance explained by the predicted transcriptome.

121 Since the PVE varies depending on the underlying heritability of the trait, we also calculated the propor-  
 122 tion of SNP heritability explained by the predicted transcriptome as the ratio of PVE and heritability. We  
 123 term this values “regulability” (Barbeira et al., 2020a). For the SNP-heritability we used publicly available  
 124 heritability estimates based on LDSC regression (Bulik-Sullivan et al., 2015) in UK Biobank Europeans for  
 125 the same set of phenotypes (see details in section 1.7).

126 As shown in Fig.2A, in the European target set, GTEx EUR whole blood based predicted transcriptome  
127 captured on average 20.6% (s.e.=2.1%) of the trait variability. This result is largely consistent to the  
128 estimates reported previously using a different approach (Yao et al., 2019).

### 129 **Aggregating predicted transcriptomes in multiple tissues increases the PVE**

130 To explore ways to increase the proportion of variance explained (PVE), we calculated the proportion  
131 explained collectively by the transcriptome predicted in 10 tissues, including muscle, adipose, tibial artery,  
132 breast, lung, fibroblast, lung, tibial nerve, and skin, with sample sizes ranging from 337 to 602 (Supplementary  
133 Table S3). As anticipated, we found that, collectively, the predicted transcriptomes in 10 tissues explained  
134 a larger portion of heritability: on average 34.4% (s.e. = 3.3%) of the heritability corresponding to a 48%  
135 increase relative to whole blood alone. This result suggests that adding transcriptomes from multiple tissues  
136 will improve predictions in general.

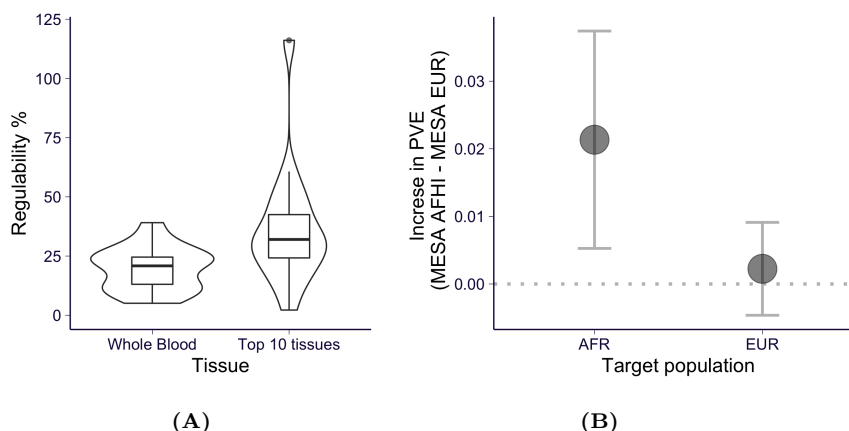

**Figure 2: Proportion of variance explained (PVE) by the predicted transcriptome.** (A) shows the ratio of PVE (the proportion of phenotypic variation explained by the predicted transcriptome) of GTEx EUR transcriptome model over the chip heritability using whole blood on the left and using 10 tissues on the right. (B) shows the mean of the difference between the PVE by the predicted MESA AFHI transcriptome and the PVE by the MESA EUR transcriptome. For the African set, the MESA AFHI transcriptome explains more variance than the MESA EUR transcriptome. In the European set, the difference between the two transcriptomes is not significant. The vertical bars show the 95% confidence intervals estimated with paired t-test.

### 137 **Matching training and target ancestries increases the proportion of variance explained**

138 Next, we examined whether using transcriptomes trained in a population genetically closer to the target set  
139 could explain a larger proportion of the trait variance. For this, we took advantage of the availability of  
140 trans-ancestry transcriptome prediction models from the MESA cohort (Mogil et al., 2018). One of them  
141 (MESA-EUR) was trained in a European population and the other one (MESA AFHI) was trained in a

142 combination of African American and Hispanic populations (Supplementary Table S3). We decided to use  
143 the combined (African American and Hispanic) transcriptome prediction since the similarity of the sample  
144 sizes (578 vs 585) would make the comparison with the European trained models more fair.

145 We found that (Fig.2B) in the African target set, using the ancestry matched MESA AFHI transcriptome  
146 yielded a significantly higher (2.1% with s.e. = 0.8%) proportion of variance explained than when using the  
147 MESA EUR transcriptome. For the European target set, the difference between using the MESA AFHI or  
148 the EUR transcriptomes was not significantly different from 0.

## 149 **Building PRS and PTRS**

150 After having determined that it is possible to capture a significant portion of trait variability using predicted  
151 transcriptome and that matching the training and target set ancestries can increase the portion explained,  
152 we proceeded to build the PRS and PTRS in our discovery set (356K Europeans from the UK biobank).

153 We built PTRS weights using elastic net, a regularized linear regression approach, which selects a sparse  
154 set of predicted expression features to make up the PTRS. For PRS weights, we used the standard LD  
155 clumping and p-value thresholding approach (see details Methods section section 1.3).

156 We quantified the prediction accuracy in each target set using the partial  $R^2$  ( $\tilde{R}^2$ ), which provides a  
157 measure of correlation between predicted and observed outcomes with the added benefit of taking covariates  
158 into account (see details in section 1.10).

159 All the weights were calculated in the discovery set, however, to boost the prediction performance across  
160 the board, we performed an additional tuning step in the target populations. This was done for all scores  
161 (PRS and PTRS) in each target set so that the comparison remains fair. For PRS, we chose the p-value  
162 threshold that yielded the highest  $\tilde{R}^2$  in each target set. For PTRS, we pre-computed weights for a range  
163 of regularization parameters in the discovery set and chose the parameter that maximized the  $\tilde{R}^2$  in each  
164 target set.

## 165 **PTRS prediction accuracy outperforms expectation given their PVE explained**

166 Tested in the European target sets with European training set transcriptome models, the mean prediction  
167 accuracy of PTRS (GTEx EUR based) was lower than the accuracy of PRS (paired t-test  $p = 0.03$ ) as  
168 shown in Fig.3A for the 17 traits. However, PTRS performance was much higher than what could have  
169 been expected given that predicted expression only explained about a fifth of the trait variation explained  
170 by typed and imputed SNPs. This better than expected performance indicates that integrating predicted  
171 transcriptomes and other omics is a promising avenue to improve PRS performance in general.

## 172 Matching training and target ancestries improves prediction accuracy

173 To test whether matching the training and target ancestries would improve the PTRS prediction accuracy, we  
174 examined the difference between using the African transcriptome (MESA AFHI) vs the European transcrip-  
175 tome (MESA EUR). As hypothesized, the PTRS based on the MESA AFHI transcriptome yielded accuracy  
176 higher than the PTRS based on the MESA EUR transcriptome when the target set was African. Similarly,  
177 for the European target set, the European transcriptome based PTRS had better accuracy than the AFHI  
178 transcriptome based ones. Fig.3B shows the small but significant difference ( $R^2(\text{AFHI}) - R^2(\text{EUR})$ ), which  
179 was positive (0.14%, s.e.= 0.06%) for the African target set and negative for the European target sets (-0.77%  
180 s.e.=0.08%), consistent with the positive effect of matching the ancestries.

181 To avoid differences due to having different number of predicted genes, PTRS were built using only the  
182 genes that were present in both training sets, EUR and AFHI. See details in Methods section section 1.8.

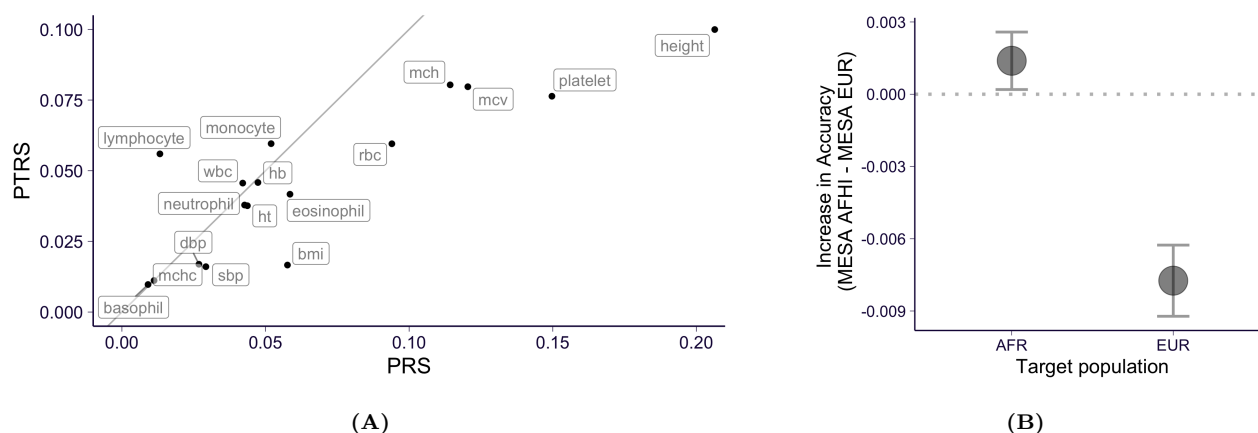

**Figure 3: Prediction accuracy of predicted transcriptome risk scores (PTRS).** (A) Prediction accuracy, measured by partial  $\tilde{R}^2$ , of PTRS (on y-axis) compared to the accuracy of PRS (on x-axis). Given the fact that the PVE by predicted expression was on average 20.1% of the heritability, PTRS is performing much better than expected. (B) The difference in the prediction accuracies between MESA AFHI and MESA EUR models for the set of African samples and European samples. Matching training and target set ancestries leads to improved prediction accuracy: AFHI transcriptome yields better prediction accuracy in the African target set and EUR transcriptome yield better prediction accuracy in the European target set.

## 183 PTRS improves portability into the African population

184 To test our hypothesis that PTRS can generalize more robustly across populations than the standard PRS,  
185 we defined ‘portability’ as the predictive accuracy in each population relative to the European reference  
186 target set (EUR ref.). This is calculated as the ratio of the  $\tilde{R}^2$  in the target population divided by the  $\tilde{R}^2$   
187 in the European reference target set. Thus, by definition the portability in the European reference set is 1.



188 Consistent with reports by (Martin et al., 2019), the portability of PRS degrades with the genetic distance  
189 to the European discovery set as shown in gray in Fig.4A. The portability of PTRS (shown in orange) also  
190 decreases with genetic distance to the discovery set, with the African target sets showing the largest loss of  
191 accuracy, as expected. However, we also observed that the portability of PTRS in the African target set  
192 was significantly higher than the portability of PRS (paired t-test  $p=0.03$ ). These results provide strong  
193 proof of principle that integrating predicted transcriptome as done with PTRS has the potential to improve  
194 portability of risk scores across populations.

195 In the European test set, we observed quite a bit of variability in the portability, ranging from 0.54  
196 to 2.21, despite the fact that both European target sets were randomly sampled from the same European  
197 UK Biobank participant set. As expected, the median portability in the second EUR target set is centered  
198 around 1.

199 Finally, we used the MESA EUR and AFHI models to assess the potential improvement in portability  
200 when matching training and target set ancestries. As shown in Fig.4B, PTRS based on AFHI transcriptome  
201 has significantly higher portability than the MESA-EUR transcriptome-based PTRS (paired t-test  $p=0.021$ ).  
202 As an additional evidence of improved portability of PTRS in general, we replicated the higher portability  
203 of the EUR-based PTRS compared to PRS using an independent training set (MESA vs GTEx as described  
204 above).

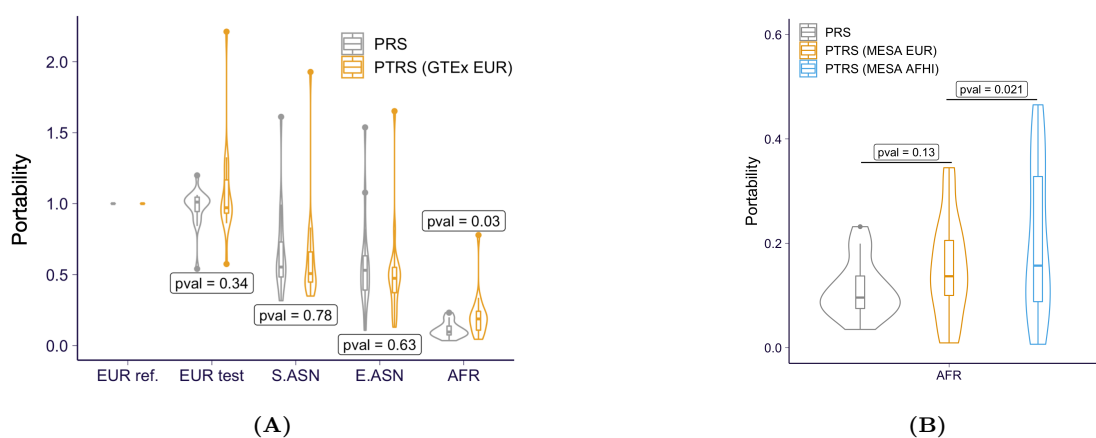

**Figure 4: Portability of PTRS for 17 quantitative phenotypes in UK Biobank.** (A) The portability of PTRS trained and calculated using GTEx EUR whole blood samples are shown in yellow with the PRS shown in gray (left panel). ‘EUR ref.’ set is used as the reference population in the calculation of portability (section 1.11) so that the portability is always 1. (B) The right panel shows the portability in the AFR target set using the MESA transcriptome models trained in EUR and AFHI sets. We observed the trend that PTRS has better portability using EUR transcriptomes both from GTEx and MESA. The gain in the AFR set is even higher when AFR transcriptomes are used for the PTRS.

205 Taken together, our results provide support to our hypothesis that PTRS can transfer more robustly than  
206 PRS, which can be improved by using ancestry matching transcriptomes. Also they suggests that adding  
207 transcriptomes predicted in other tissues and other omics data can further improve PRS generalizability.

## 208 Discussion

209 In this paper, we showed that informing genetic risk score building using genetically determined gene ex-  
210 pression traits as intermediate predictors as implemented with PTRS can lead to predictors that are more  
211 portable across populations, especially if matched ancestry transcriptomes are used.

212 We found that the total trait variation that can be explained via predicted transcriptomes range from  
213 20.6% (using whole blood) to 34.4% (with a broader sets of tissues) of the SNP heritability, i.e. the total  
214 variation that can be explained using common SNPs. Promisingly, the actual predictors built on predicted  
215 transcriptomes had performances that were much higher than the expected 20.6% of the PRS performance.  
216 The predicted transcriptome tended to be more predictive if it was trained with individuals from the same  
217 ancestry stressing the advantages of collecting transcriptome reference data in diverse populations.

218 We found that the portability of PTRS was significantly higher than the portability of PRS in the  
219 African target set, the most affected by the Eurocentric bias in GWAS studies, with further gains when the  
220 transcriptome was trained in matched ancestry samples.

221 Our results show that investing in multi-omic studies of diverse populations may be a cost effective way  
222 to reduce current genomic disparities by taking better advantage of existing GWAS studies. Developments  
223 of methods to optimally combine PRS and PTRS should be encouraged.

224 Our study points to promising strategies to improve risk prediction in general but it also has several  
225 limitations. First, PTRS are based on prediction models of gene expression traits which we estimated to  
226 account for less than a third of the total variability in the complex traits considered here. We expect this  
227 limitation to be mitigated as additional transcriptome reference sets as well as other omics data covering  
228 mediating mechanisms missed in current models. Second, we used single tissue prediction models for most  
229 of the analysis in this paper, which captured a fifth of the variation in the complex traits here. We will  
230 develop approaches to integrate multiple tissue models. Third, weights for PRS were calculated using  
231 GWAS summary results (thresholding and pruning method) whereas PTRS weights were calculated using  
232 individual level data due to computational considerations. Future analysis will be performed using individual  
233 level data for PRS by using biobank-scale ready elastic net approaches such as (Qian et al., 2020). Fourth,  
234 higher quality prediction models of the transcriptome in non-European ancestries are limited. Here we used  
235 predictors trained in monocyte samples assayed with older array technology. Multiple ancestry models are  
236 currently being generated by us and other groups. For example, the MESA TOPMED project has assayed  
237 RNAseq, protein, methylation, and metabolomics data in African Americans, Hispanics, and Asian ancestry

238 individuals which will allow the development of improved prediction models.

## 239 1 Material and Methods

### 240 1.1 Obtaining individuals and phenotypes from UK Biobank

241 We used data from UK Biobank data downloaded on July 19 2017. We excluded related individuals and the  
242 ones with high missing rate or other sequencing quality issues. As covariates, we extracted age at recruitment  
243 (Data-Field 21022), sex (Data-Field 31), and the first 20 genetic PCs. The ancestry information of individ-  
244 uals was obtained from Data-Field 21000 and we kept individuals labelled as ‘British’, ‘Indian’, ‘Chinese’,  
245 or ‘African’ (according to Data-Coding 1001: [http://biobank.ctsu.ox.ac.uk/crystal/coding.cgi?id=](http://biobank.ctsu.ox.ac.uk/crystal/coding.cgi?id=1001)  
246 1001). Throughout the paper, we labeled ‘British’ individuals as EUR, ‘Indian’ individuals as S.ASN, ‘Chi-  
247 nese’ individuals as E.ASN, and ‘African’ individuals as AFR. The measurements of the 17 quantitative  
248 phenotypes (as shown in Supplementary Table S1) across all available instances and arrays were retrieved.  
249 The data retrieval described above was performed using ukbREST (Pividori and Im, 2019){[pividori:2019](#)}  
250 with the query YAML file available at [https://github.com/lianggy/ptrs-ukb/blob/master/output/](https://github.com/lianggy/ptrs-ukb/blob/master/output/query_phenotypes.yaml)  
251 [query\\_phenotypes.yaml](#).

252 If one individual has multiple measurements for the same phenotype (in more than one instances and/or  
253 more than one arrays), we collapsed multiple arrays by taking the average and we aggregated measurements  
254 across multiple instances by taking the first non-missing value. Individuals with missing phenotype in any  
255 of the 17 quantitative phenotypes or covariates were excluded.

### 256 1.2 Quality control on self-reported ancestry

257 To ensure the quality of ancestry label, we removed individuals who deviate substantially from the popu-  
258 lation that they were assigned to. Specifically, for population  $k$  among the 4 populations (EUR, S.ASN,  
259 E.ASN, and AFR), we treated the distribution of the individuals, in the space of the first 10 PCs, as  
260 multivariate normal. And we calculated the observed population mean  $\hat{\mu}_k$  and covariance  $\hat{\Sigma}_k$  accord-  
261 ingly. Then, for each individual  $i$  in population  $k$ , we evaluated the “similarity”  $S_{ik}$  to the population  $k$   
262 as  $S_{ik} = \log \Pr(\text{PC}_i^1, \dots, \text{PC}_i^{10}; \hat{\mu}_k, \hat{\Sigma}_k)$ . Intuitively, if an individual has genetic background differing from is  
263 the assigned population, the corresponding  $S_{ik}$  will be much larger than others. So, we filtered out individ-  
264 uals with  $S_{ik} \leq -50$  in the assigned population  $k$ . This cutoff was picked such that  $S_{ik'}$  for any un-assigned  
265 population  $k'$  has  $S_{ik'} \leq -50$  for all individuals.

266 The number of individuals remained after data retrieval and ancestry quality control is listed Supple-  
267 mentary Table S2.

### 268 1.3 Performing GWAS and building LD-clumping based PRS models

269 We built PRS using the genotypes and phenotypes of the individuals in the discovery data set (the details of  
270 data splitting is described in section 1.11). We performed GWAS (linear regression) using `linear_regression_rows`  
271 in `hail v0.2` where we included covariates: first 20 genetic PCs, age, sex, age<sup>2</sup>, sex × age, and sex × age<sup>2</sup>.  
272 In the GWAS run, we excluded variants with minor allele frequency < 0.001 and variants that significantly  
273 deviate from Hardy-Weinberg equilibrium (p-value < 10<sup>-10</sup>). And the phenotype in their original scales  
274 were used.

To obtain relatively independent associations for PRS construction, we run LD clumping using `plink1.9` with option `-clump -clump-p1 1 -clump-r2 0.1 -clump-kb 250`. This command extracted genetic variants in the order of their GWAS significances and excluded all variants having  $R^2 > 0.1$  to or 250 kb within any variants that have already been included. The PRS was constructed on the basis of the set of variants obtained from the LD clumping along with the marginal effect size estimated in GWAS run. Specifically, we calculated PRSs at a series of GWAS p-value thresholds:  $5 \times 10^{-8}$ ,  $10^{-7}$ ,  $10^{-6}$ ,  $10^{-5}$ ,  $10^{-4}$ ,  $10^{-3}$ , 0.01, 0.05, 0.1, 0.5, and 1. In other word, at threshold  $t$ , the PRS for individual  $i$  was calculated as

$$\text{PRS}_i^t = \sum_{j:p_j \leq t} X_{ij} \hat{b}_j, \quad (1)$$

275 where  $X_{ij}$  is the effect allele dosage of variant  $j$  in individual  $i$  and  $\hat{b}_j$  is the estimated effect size of variant  
276  $j$  from GWAS run.

277 At the testing stage, given the genotype of an individual, we calculated the PRS of the individual using  
278 eq. (1).

### 279 1.4 Computing the predicted transcriptome

280 We computed predicted gene expression for all individuals passing filtering steps and quality control. We  
281 utilized two sets of prediction models: 1) CTIMP models (proposed in (Hu et al., 2019)) trained on GTEx v8  
282 EUR individuals (Barbeira et al., 2020b){[barbeira:2020](#)}; and 2) elastic net models which were trained on Eu-  
283 ropeans (EUR) or African Americans in combination with Hispanics (AFHI) (Mogil et al., 2018){[mogil:2018](#)}.  
284 The sample size and tissue informations of the prediction models are listed in Supplementary Table S3.

### 285 1.5 Estimating PVE by predicted transcriptome of a single tissue

To get a sense on the predictive power of predicted transcriptome on the phenotypes of interest, we estimated the proportion of phenotypic variation that could be explained by the predicted transcriptome in aggregate.

Specifically, we assume the following mixed effect model (for individual  $i$ ).

$$Y_i = \mu + \sum_l C_{il} a_l + \sum_g \tilde{T}_{ig} \beta_g + \epsilon_i \quad (2)$$

$$\epsilon_i \sim_{iid} N(0, \sigma_\epsilon^2) \quad (3)$$

$$\beta_g \sim_{iid} N(0, \frac{\sigma_g^2}{M}), \quad (4)$$

286 where  $M$  denotes the number of genes,  $C_{il}$  is the  $l$ th covariate,  $\tilde{T}_{ig}$  is the inverse normalized predicted  
 287 expression for gene  $g$ , and  $Y_i$  is the observed phenotype. By inverse normalization, we converted the predicted  
 288 expression  $\hat{T}_{ig}$  to  $\tilde{T}_{ig}$  by  $\tilde{T}_{ig} = \Phi^{-1}(\frac{\text{rank}(\hat{T}_{ig})}{N+1})$  within each gene  $g$  where  $N$  is the number of individuals and  
 289 ‘rank’ is in increasing order. So that we have  $\tilde{T}_{ig} \sim N(0, 1)$ . The parameters of the model were estimated  
 290 using `hail v0.2 stats.LinearMixedModel.from_kinship` with  $K$  matrix being set as  $\tilde{T}^t \tilde{T} / M$ . And PVE is  
 291 calculated as  $\frac{\hat{\sigma}_g^2}{\hat{\sigma}_\epsilon^2 + \hat{\sigma}_g^2}$ . The same set of covariates as section 1.3 were used.

292 The PVE estimation was performed for each transcriptome model and population pairs. For non-  
 293 European populations, all individuals were included in the analysis. We randomly selected 5,000 EUR  
 294 individuals for the analysis.

## 295 1.6 Estimating PVE by predicted transcriptome of multiple tissues

296 The genetic effects on the complex trait can be mediated through the regulation of expression in different  
 297 tissues so that including predicted transcriptomes in multiple tissues could potentially improve the prediction  
 298 performance. To test this idea, we performed PVE analysis as described in section 1.5 using predicted  
 299 expression in 10 GTEx tissues (listed in Supplementary Table S3). To account for colinearity issues induced  
 300 by the high correlation of predicted expression among tissues, we preselected linearly independent ‘eigen-  
 301 predicted expression’ traits using singular vectors of the predicted expression data. This approach is similar  
 302 to the one used for combining PrediXcan association in multiple tissues (Barbeira et al., 2019). The PVE  
 303 was calculated using a mixed effects model similar to eq. (2) where the expression traits were replaced by  
 304 the eigen-predicted expression traits.

Briefly, the eigen-predicted expression traits were calculated as follows. For each gene  $g$ , let  $\hat{T}_g^j =$   
 $(\hat{T}_{1g}^j, \dots, \hat{T}_{Ng}^j)$  denote the predicted expression (with standardization) of  $g$  in tissue  $j$  across individual  
 $i = 1, \dots, N$ . By collecting  $\hat{T}_g^j$  for all tissues which have prediction model for gene  $g$  (suppose there are  $J$  of  
 them), we have a matrix  $\mathcal{T}_g \in \mathbb{R}^{N \times J}$  where columns correspond to tissues. To remove the colinearity in the  
 columns of  $\mathcal{T}_g$  by keeping linearly independent predictors, we used the first  $K$  left singular vectors of  $\mathcal{T}_g$  with  
 $K$  selected as follows. We performed PCA on  $\hat{\mathcal{T}}_g^t \hat{\mathcal{T}}_g$  and any  $k$ th PC  $V_g^k$  was excluded if  $\lambda_k / \lambda_{\max} \leq 1/30$ .  
 The leading  $K$  left singular vectors (up to a scaling factor) of  $\hat{\mathcal{T}}_g$  was reconstructed as follow.

$$U_g^k = \hat{\mathcal{T}}_g V_g^k \quad (5)$$

305 We further inverse normalized  $U_g^k$  (as described in section 1.5) resulting in  $\tilde{U}_g^k$ , which were plugged into  
306 eq. (2) the procedure described in the previous subsection 1.5.

## 307 1.7 Retrieving publicly available heritability estimates

308 We retrieved chip heritability estimates by LDSC regression (Bulik-Sullivan et al., 2015) from [https://nealelab.github.io/UKBB\\_ldsc/downloads.html](https://nealelab.github.io/UKBB_ldsc/downloads.html) where we downloaded the file [https://www.dropbox.com/s/8vca84rsslgsua/ukb31063\\_h2\\_topline.020ct2019.tsv.gz?dl=1](https://www.dropbox.com/s/8vca84rsslgsua/ukb31063_h2_topline.020ct2019.tsv.gz?dl=1). These estimates were calcu-  
309 lated with GWAS summary statistics obtained from UK Biobank Europeans with inverse normalized phe-  
310 notypes. We extracted phenotypes of interest by their UKB Field ID. And we used columns `h2_observed`  
311 and `h2_observed_se` as the estimated value and standard error of the heritability estimation.  
312  
313

## 314 1.8 Building PTRS models using elastic net

For each of the 17 quantitative phenotypes, we trained elastic net model to predict the phenotype of interest using the predicted transcriptome (in a single tissue) as features. The same set of covariates as described in section 1.3 were used. Let  $\hat{T}_g \in \mathbb{R}^{N \times 1}$  denote the standardized predicted expression level of gene  $g$  across  $N$  individuals. Similarly, let  $C_l \in \mathbb{R}^{N \times 1}$  denote the observed value of the  $l$ th standardized covariate. We fit the following elastic net model.

$$\beta^{\text{EN}} = \arg \min_{\beta} \overbrace{\frac{1}{N} \|Y - X\beta - \beta_0\|_2^2}^{\text{loss: } l(\beta)} + \lambda \alpha \|\beta\|_1 + \lambda(1 - \alpha) \|\beta\|_2^2 \quad (6)$$

$$X := [\hat{T}_1, \dots, \hat{T}_M, C_1, \dots, C_L], \quad (7)$$

315 where  $\beta_0$  is the intercept,  $M$  is the number of genes,  $L$  is the number of covariates,  $\|\beta\|_2^2$  is the  $l_2$  norm and  
316  $\|\beta\|_1$  is the  $l_1$  norm of the effect size vector. Here,  $\alpha$  controls the relative contribution of the  $l_1$  penalization  
317 term and  $\lambda$  controls the overall strength of regularization.

The model fitting procedure was implemented using tensorflow v2 with mini-batch proximal gradient method and the code is available at <https://github.com/liangyy/ptrs-tf>. We trained models at  $\alpha = 0.1$  ( $\alpha = 0.5$  and  $0.9$  show similar performance). And fixing the  $\alpha$  value, as suggested in (Friedman et al., 2010){friedman:2010}, we trained a series of models for a sequence of  $\lambda$ 's starting from the highest. The maximum  $\lambda$  value,  $\lambda_{\max}$ , was determined as the smallest  $\lambda$  such that eq. (8) is satisfied.

$$|\nabla l(\beta)| \leq \alpha \lambda, \quad (8)$$

where the gradient is evaluated at

$$\beta_0 = \bar{Y}, \beta_{\text{covariate}} = 0, \beta_{\text{transcriptome}} = 0 \quad (9)$$

318 So, at  $\lambda = \lambda_{\max}$ , eq. (9) is the solution to eq. (6), which could serve as the initial points for the subsequent  
319 fittings of  $\lambda$ 's. We estimated  $\lambda_{\max}$  using the first 1000 individuals of the data. And the sequence of  $\lambda$  was  
320 set to be 20 equally spaced points in log scale with the maximum value being  $1.5\lambda_{\max}$  and the minimum  
321 value being  $\lambda_{\max}/10^4$ . Among these PTRS models generated at different  $\lambda$  values, we only kept the first  
322 11 non-degenerate PTRS models so that we have the same number of candidate models for both PRS and  
323 PTRS.

### 324 **Transcriptome prediction models for PTRS construction**

325 The predicted transcriptome in the discovery set (UKB EUR) was calculated using models from GTEx  
326 (Barbeira et al., 2020b) and MESA EUR based models (Mogil et al., 2018) listed in Supplementary Table  
327 S3). The GTEx EUR whole blood transcriptome consisted of 7,041 genes. For the MESA transcriptomes,  
328 we restricted the prediction to the 4,041 genes that were present in both the MESA EUR models and the  
329 MESA AFHI models (to ensure that PTRS built in the discovery set with the EUR models could be computed  
330 without missing genes in the target sets using the AFHI models).

### 331 **1.9 Testing of PTRS in target sets**

At the testing stage, given the standardized (within the population) predicted transcriptome of an individual,  
we calculated the PTRS of the individual using the following:

$$\text{PTRS}_i^\lambda = \sum_g \hat{T}_{ig} \beta_g^\lambda, \quad (10)$$

332 where  $\beta^\lambda$  denotes the  $\beta^{\text{EN}}$  obtained at hyperparameter equal to  $\lambda$ . For the PTRS built upon from GTEx EUR  
333 predicted transcriptome, the target PTRS was calculated with the GTEx EUR transcriptome (transcriptome  
334 predicted with GTEx EUR gene expression prediction models). To examine the utility of population-matched  
335 prediction model, the PTRS on the target set were calculated with of both MESA EUR and MESA AFHI  
336 transcriptomes.

### 337 **1.10 Quantifying the prediction accuracy of PRS and PTRS with partial $R^2$**

To measure the predictive performance of PRS and PTRS, we calculated the partial  $R^2$  of PRS/PTRS  
against the observed phenotype accounting for the set of covariates listed in section 1.3. Specifically, for  
individual  $i$ , let  $\hat{y}_i$  denote the predicted phenotype which could be either PRS or PTRS and  $y_i$  denote the  
observed phenotype. Partial  $R^2$  (denoted as  $\tilde{R}^2$  below) is defined as the relative difference in sum of squared  
error (SSE) between two linear models: 1)  $y \sim 1 + \text{covariates}$  (null model); and 2)  $y \sim 1 + \text{covariates} + \hat{y}$  (full  
model), *i.e.*  $\tilde{R}^2 = 1 - \frac{\text{SSE}_{\text{full}}}{\text{SSE}_{\text{null}}}$ . To enable fast computation, we calculated  $\tilde{R}^2$  using an equivalent formula

shown in eq. (11) which relies on the projection matrix of the null model.

$$\tilde{R}^2 = \frac{\mathcal{C}^2(y, \hat{y})}{\mathcal{C}(y, y)\mathcal{C}(\hat{y}, \hat{y})} \quad (11)$$

$$\mathcal{C}(u, v) := u^t v - u^t H v, \quad (12)$$

338 where  $H$  is the projection matrix of the null model, *i.e.*  $H = \tilde{C}(\tilde{C}^t \tilde{C})^{-1} \tilde{C}^t$  where  $\tilde{C} = [1, C_1, \dots, C_L]$  with  
339  $C_l$  being the  $l$ th covariate.

## 340 1.11 Quantifying the portability of PRS and PTRS

341 As stated in the results section, PTRS weights were computed in the discovery set (UKB EUR) and tested  
342 in the 5 target sets. For each of the 17 quantitative traits, 11 sets of weights for PRS and for PTRS were  
343 calculated with different hyperparameters. For PRS, different p-value thresholds were used to generate 11  
344 different sets of weights. For PTRS, 11 different regularization parameters were used to generate the different  
345 sets of weights. The prediction accuracy in each of the 5 the target sets were calculated using the partial  $R^2$   
346 described in section section 1.10 and the highest  $R^2$  among the 11 sets weights were used as the prediction  
347 accuracy. Portability was defined as the ratio of the prediction accuracy in each target set divided by the  
348 prediction accuracy in the European reference set. Therefore, by definition, portability in the EUR ref. set  
349 was 1.

350 When calculating the portability of PTRS using MESA AFHI transcriptome, we used the MESA EUR  
351 model  $\tilde{R}_{\text{EUR ref.}}^2$  as the reference. This is a conservative choice since MESA EUR model is expected to  
352 perform better than MESA AFHI model among EUR individuals.

## 353 Acknowledgements

354 We thank Owen Melia for help managing the UK Biobank data. HKI and YL were partially funded by  
355 R01MH10766 and P30 DK20595 (Diabetes Research and Training Center).

## 356 Disclosure

357 H.K.I. has received speaker honoraria from GSK and AbbVie.

## 358 Code and data availability

359 Code for data analysis is at <https://github.com/lianggy/ptrs-ukb>. Code for mini-batch elastic net is  
360 at <https://github.com/lianggy/ptrs-tf>. The chip heritability and PVE analysis results are at Supple-



361 mentary Table S4 and Supplementary Table S5. And the PRS and PTRS  $\tilde{R}^2$  results are at Supplementary  
362 Table S6 and Supplementary Table S7.

## 363 References

- 364 A. N. Barbeira, M. Pividori, J. Zheng, H. E. Wheeler, D. L. Nicolae, and H. K. Im. Integrating predicted  
365 transcriptome from multiple tissues improves association detection. *PLoS genetics*, 15(1):e1007889, 2019.
- 366 A. N. Barbeira, R. Bonazzola, E. R. Gamazon, Y. Liang, Y. Park, S. Kim-Hellmuth, G. Wang, Z. Jiang,  
367 D. Zhou, F. Hormozdiari, et al. Exploiting the gtex resources to decipher the mechanisms at gwas loci.  
368 *bioRxiv*, page 814350, 2020a.
- 369 A. N. Barbeira, O. J. Melia, Y. Liang, R. Bonazzola, G. Wang, H. E. Wheeler, F. Aguet, K. G. Ardlie,  
370 X. Wen, and H. K. Im. Fine-mapping and qtl tissue-sharing information improves the reliability of causal  
371 gene identification. *Genetic Epidemiology*, 2020b.
- 372 B. K. Bulik-Sullivan, P.-R. Loh, H. K. Finucane, S. Ripke, J. Yang, N. Patterson, M. J. Daly, A. L. Price,  
373 B. M. Neale, S. W. G. of the Psychiatric Genomics Consortium, et al. Ld score regression distinguishes  
374 confounding from polygenicity in genome-wide association studies. *Nature genetics*, 47(3):291, 2015.
- 375 C. Bycroft, C. Freeman, D. Petkova, G. Band, L. T. Elliott, K. Sharp, A. Motyer, D. Vukcevic, O. Delaneau,  
376 J. O’Connell, et al. The uk biobank resource with deep phenotyping and genomic data. *Nature*, 562(7726):  
377 203–209, 2018.
- 378 A. Choudhury, S. Aron, L. R. Botigué, D. Sengupta, G. Botha, T. Bensellak, G. Wells, J. Kumuthini,  
379 D. Shriner, Y. J. Fakim, A. W. Ghoorah, E. Dareng, T. Odia, O. Falola, E. Adebisi, S. Hazelhurst,  
380 G. Mazandu, O. A. Nyangiri, M. Mbiyavanga, A. Benkahla, S. K. Kassim, N. Mulder, S. N. Adebamowo,  
381 E. R. Chimusa, D. Muzny, G. Metcalf, R. A. Gibbs, TrypanoGEN Research Group, C. Rotimi, M. Ramsay,  
382 H3Africa Consortium, A. A. Adeyemo, Z. Lombard, and N. A. Hanchard. High-depth african genomes  
383 inform human migration and health. *Nature*, 586(7831):741–748, Oct. 2020.
- 384 D. Curtis. Polygenic risk score for schizophrenia is more strongly associated with ancestry than with  
385 schizophrenia. *Psychiatric genetics*, 28(5):85–89, 2018.
- 386 J. Friedman, T. Hastie, and R. Tibshirani. Regularization paths for generalized linear models via coordinate  
387 descent. *Journal of statistical software*, 33(1):1, 2010.
- 388 E. R. Gamazon, H. E. Wheeler, K. P. Shah, S. V. Mozaffari, K. Aquino-Michaels, R. J. Carroll, A. E. Eyler,  
389 J. C. Denny, D. L. Nicolae, N. J. Cox, et al. A gene-based association method for mapping traits using  
390 reference transcriptome data. *Nature genetics*, 47(9):1091, 2015.

- 391 J. M. Gaziano, J. Concato, M. Brophy, L. Fiore, S. Pyarajan, J. Breeling, S. Whitbourne, J. Deen, C. Shan-  
392 non, D. Humphries, et al. Million veteran program: A mega-biobank to study genetic influences on health  
393 and disease. *Journal of clinical epidemiology*, 70:214–223, 2016.
- 394 A. Gusev, A. Ko, H. Shi, G. Bhatia, W. Chung, B. W. Penninx, R. Jansen, E. J. De Geus, D. I. Boomsma,  
395 F. A. Wright, et al. Integrative approaches for large-scale transcriptome-wide association studies. *Nature*  
396 *genetics*, 48(3):245–252, 2016.
- 397 Y. Hu, M. Li, Q. Lu, H. Weng, J. Wang, S. M. Zekavat, Z. Yu, B. Li, J. Gu, S. Muchnik, et al. A statistical  
398 framework for cross-tissue transcriptome-wide association analysis. *Nature genetics*, 51(3):568–576, 2019.
- 399 A. V. Khera, M. Chaffin, K. G. Aragam, M. E. Haas, C. Roselli, S. H. Choi, P. Natarajan, E. S. Lander,  
400 S. A. Lubitz, P. T. Ellinor, et al. Genome-wide polygenic scores for common diseases identify individuals  
401 with risk equivalent to monogenic mutations. *Nature genetics*, 50(9):1219, 2018.
- 402 A. R. Martin, M. Kanai, Y. Kamatani, Y. Okada, B. M. Neale, and M. J. Daly. Clinical use of current  
403 polygenic risk scores may exacerbate health disparities. *Nature genetics*, 51(4):584, 2019.
- 404 L. S. Mogil, A. Andaleon, A. Badalamenti, S. P. Dickinson, X. Guo, J. I. Rotter, W. C. Johnson, H. K.  
405 Im, Y. Liu, and H. E. Wheeler. Genetic architecture of gene expression traits across diverse populations.  
406 *PLoS genetics*, 14(8):e1007586, 2018.
- 407 A. of Us Research Program Investigators. The “all of us” research program. *New England Journal of Medicine*,  
408 381(7):668–676, 2019.
- 409 M. Pividori and H. K. Im. ukbrest: efficient and streamlined data access for reproducible research in large  
410 biobanks. *Bioinformatics*, 35(11):1971–1973, 2019.
- 411 J. Qian, Y. Tanigawa, W. Du, M. Aguirre, C. Chang, R. Tibshirani, M. A. Rivas, and T. Hastie. A fast and  
412 scalable framework for large-scale and ultrahigh-dimensional sparse regression with application to the uk  
413 biobank. *PLoS genetics*, 16(10):e1009141, 2020.
- 414 H. Shi, K. S. Burch, R. Johnson, M. K. Freund, G. Kichaev, N. Mancuso, A. M. Manuel, N. Dong, and  
415 B. Pasaniuc. Localizing components of shared transethnic genetic architecture of complex traits from gwas  
416 summary data. *The American Journal of Human Genetics*, 2020.
- 417 D. Taliun, D. N. Harris, M. D. Kessler, J. Carlson, Z. A. Szpiech, R. Torres, S. A. G. Taliun, A. Corvelo,  
418 S. M. Gogarten, H. M. Kang, et al. Sequencing of 53,831 diverse genomes from the nhlbi topmed program.  
419 *BioRxiv*, page 563866, 2019.

- 420 The GTEx Consortium. The gtex consortium atlas of genetic regulatory effects across human tissues. *Science*,  
421 369(6509):1318–1330, 2020.
- 422 U. Vösa, A. Claringbould, H.-J. Westra, M. J. Bonder, P. Deelen, B. Zeng, H. Kirsten, A. Saha, R. Kreuzhu-  
423 ber, S. Kasela, et al. Unraveling the polygenic architecture of complex traits using blood eqtl metaanalysis.  
424 *BioRxiv*, page 447367, 2018.
- 425 J. Yang, B. Benyamin, B. P. McEvoy, S. Gordon, A. K. Henders, D. R. Nyholt, P. A. Madden, A. C. Heath,  
426 N. G. Martin, G. W. Montgomery, et al. Common snps explain a large proportion of the heritability for  
427 human height. *Nature genetics*, 42(7):565, 2010.
- 428 D. W. Yao, L. J. O’connor, A. L. Price, and A. Gusev. Quantifying genetic effects on disease mediated by  
429 assayed gene expression levels. *BioRxiv*, page 730549, 2019.
